# Supplementary material
Source: Springer Nature journal article supplement (https://www.springermedizin.de/resource/supplementary/12891_2012_1757_MOESM2_ESM.docx/9508516)
Supplement: MOESM2 [file 9508516]

| Pseudonym | Age (years) | Time since RA diagnosis (years) | Current anti-TNF agent | Time since commenced anti-TNF (years) | Pre-therapy DAS28 score |
| --- | --- | --- | --- | --- | --- |
| **Male group**: | | | | | |
| Robert | 85 | 21 | Etanercept | 4 | 8.47 |
| Steve | 47 | 17 | Etanercept | 9 | 5.75 |
| Jim | 57 | 18 | Etanercept | 1 | 6.20 |
| Bob | 79 | 21 | Adalimumab | 7 | 5.57 |
| Terry | 46 | 11 | Adalimumab | 2 | 6.90 |
| **Female group:** |  |  |  |  |  |
| Katherine | 64 | 5 | Adalimumab | 2 | 7.08 |
| Helen | 62 | 10 | Adalimumab | 8 | 6.07 |
| Val | 64 | 26 | Adalimumab | 7 | 7.94 |
| Claire | 63 | 15 | Etanercept | 6 | 5.92 |
| Sally | 67 | 21 | Etanercept | 4 | 6.53 |

**Table 2 – Participant characteristics**
